# Supplementary material for: The Impact of Growth Hormone Therapy on the Apoptosis Assessment in CD34+ Hematopoietic Cells from Children with Growth Hormone Deficiency
Source: PubMed Central journal article supplement (PMC5297745; doi:10.3390/ijms18010111), 2017-01-07
Supplement: ijms-18-00111-s001.pdf [file ijms-18-00111-s001.pdf]

# Supplementary Materials: The Impact of Growth Hormone Therapy on the Apoptosis Assessment in CD34+ Hematopoietic Cells from Children with Growth Hormone Deficiency

Miłosz Piotr Kawa, Iwona Stecewicz, Katarzyna Piecyk, Edyta Paczkowska, Dorota Rogińska, Anna Sobuś, Karolina Łuczowska, Ewa Pius-Sadowska, Elżbieta Gawrych, Elżbieta Petriczko, Mieczysław Walczak and Bogusław Machaliński

**Table S1.** Gene Ontology (GO) terms for apoptosis-related biological processes that are over-represented in the list of significantly changed pro-apoptotic genes in the Table 2 in CD34<sup>+</sup> cells from GHD patients treated for 6 months with GH-TS compared to GHD subjects before GH therapy.

| Human Gene | GO ID <sup>s</sup> | Qualified GO Term                                                                         |
|------------|--------------------|-------------------------------------------------------------------------------------------|
| TNF        | GO:0043068         | positive regulation of programmed cell death                                              |
|            | GO:0071550         | death-inducing signaling complex assembly                                                 |
|            | GO:0008625         | extrinsic apoptotic signaling pathway via death domain receptors                          |
|            | GO:0008630         | intrinsic apoptotic signaling pathway in response to DNA damage                           |
|            | GO:0006919         | activation of cysteine-type endopeptidase activity involved in apoptotic process          |
| TNFAIP2    | GO:0006927         | transformed cell apoptotic process                                                        |
| TNFRSF1B   | GO:0001525         | angiogenesis                                                                              |
|            | GO:0097190         | apoptotic signaling pathway                                                               |
|            | GO:0097191         | extrinsic apoptotic signaling pathway                                                     |
|            | GO:0007568         | aging                                                                                     |
|            | GO:0008630         | intrinsic apoptotic signaling pathway in response to DNA damage                           |
|            | GO:0032496         | response to lipopolysaccharide                                                            |
|            | GO:0006954         | inflammatory response                                                                     |
|            | GO:0050779         | RNA destabilization                                                                       |
| CD27       | GO:0007275         | multicellular organism development                                                        |
|            | GO:0042127         | regulation of cell proliferation                                                          |
|            | GO:0006954         | inflammatory response                                                                     |
|            | GO:0097191         | extrinsic apoptotic signaling pathway                                                     |
|            | GO:0070233         | negative regulation of T cell apoptotic process                                           |
|            | GO:0008588         | release of cytoplasmic sequestered NF-kappaB                                              |
|            | GO:0008625         | extrinsic apoptotic signaling pathway via death domain receptors                          |
|            | GO:0043154         | negative regulation of cysteine-type endopeptidase activity involved in apoptotic process |
| BCL6       | GO:0032496         | response to lipopolysaccharide                                                            |
|            | GO:0006955         | immune response                                                                           |
|            | GO:0007166         | cell surface receptor signaling pathway                                                   |
|            | GO:0042127         | regulation of cell proliferation                                                          |
|            | GO:0042981         | regulation of apoptotic process                                                           |
|            | GO:0006974         | cellular response to DNA damage stimulus                                                  |
|            | GO:0002903         | negative regulation of B cell apoptotic process                                           |
|            | GO:0030308         | negative regulation of cell growth                                                        |
|            | GO:0043066         | negative regulation of apoptotic process                                                  |
|            | GO:0048821         | erythrocyte development                                                                   |
|            | GO:0030183         | B cell differentiation                                                                    |
|            | GO:0030099         | myeloid cell differentiation                                                              |
|            | GO:0006954         | inflammatory response                                                                     |
| NFKBIZ     | GO:0002829         | negative regulation of type 2 immune response                                             |
|            | GO:0050776         | regulation of immune response                                                             |
|            | GO:2000773         | negative regulation of cellular senescence                                                |
|            | GO:0006351         | transcription, DNA-templated                                                              |

Table S1. Cont.

| Human Gene | GO ID <sup>s</sup>                                 | Qualified GO Term                                                                |
|------------|----------------------------------------------------|----------------------------------------------------------------------------------|
| IL6R       | GO:0019221                                         | cytokine-mediated signaling pathway                                              |
|            | O:0006953                                          | acute-phase response                                                             |
|            | GO:0010536                                         | positive regulation of activation of Janus kinase activity                       |
|            | GO:0042517                                         | positive regulation of tyrosine phosphorylation of Stat3 protein                 |
|            | GO:0002548                                         | monocyte chemotaxis                                                              |
|            | GO:0002690                                         | positive regulation of leukocyte chemotaxis                                      |
|            | GO:0019221                                         | cytokine-mediated signaling pathway                                              |
| LITAF      | GO:0048661                                         | positive regulation of smooth muscle cell proliferation                          |
|            | GO:0051092                                         | negative regulation of NF-kappaB transcription factor activity                   |
|            | GO:0006351                                         | transcription, DNA-templated                                                     |
|            | GO:0007165                                         | signal transduction                                                              |
|            | GO:0007568                                         | cell aging                                                                       |
| TNFRSF10C  | GO:0042347                                         | negative regulation of NF-kappaB import into nucleus                             |
|            | GO:0043123                                         | positive regulation of I-kappaB kinase/NF-kappaB signaling                       |
|            | GO:0008625                                         | extrinsic apoptotic signaling pathway via death domain receptors                 |
|            | GO:0033209                                         | tumor necrosis factor-mediated signaling pathway                                 |
| TNFSF8     | GO:0007275                                         | multicellular organism development                                               |
|            | GO:0032496                                         | response to lipopolysaccharide                                                   |
|            | GO:0007165                                         | signal transduction                                                              |
| FOSB       | GO:0006915                                         | apoptotic process                                                                |
|            | GO:0007165                                         | signal transduction                                                              |
|            | GO:0000122                                         | negative regulation of transcription from RNA polymerase II promoter             |
|            | GO:0006355                                         | regulation of transcription, DNA-templated                                       |
|            | GO:0042493                                         | response to drug                                                                 |
| FNNTA      | GO:0045944                                         | positive regulation of transcription from RNA polymerase II promoter             |
|            | GO:0071277                                         | cellular response to calcium ion                                                 |
|            | GO:0012501                                         | programmed cell death                                                            |
| DAP        | GO:0006921                                         | cellular component disassembly involved in execution phase of apoptosis          |
|            | GO:0007528                                         | neuromuscular junction development                                               |
|            | GO:0006915                                         | apoptotic process                                                                |
| GADD45B    | GO:0097190                                         | apoptotic signaling pathway                                                      |
|            | GO:0006914                                         | autophagy                                                                        |
|            | GO:0010507                                         | negative regulation of autophagy                                                 |
|            | GO:0006919                                         | activation of cysteine-type endopeptidase activity involved in apoptotic process |
|            | GO:0045892                                         | negative regulation of transcription, DNA-templated                              |
|            | GO:0032088                                         | negative regulation of NF-kappaB transcription factor activity                   |
|            | GO:0006915                                         | apoptotic process                                                                |
|            | GO:0006950                                         | response to stress                                                               |
| TMBIM1     | GO:0006469                                         | negative regulation of protein kinase activity                                   |
|            | GO:0000186                                         | activation of MAPKK activity                                                     |
|            | GO:0000185                                         | activation of MAPKKK activity                                                    |
|            | GO:1900745                                         | positive regulation of p38MAPK cascade                                           |
|            | GO:0046330                                         | positive regulation of JNK cascade                                               |
|            | GO:0051726                                         | regulation of cell cycle                                                         |
|            | GO:0007275                                         | multicellular organism development                                               |
| FOXO3      | GO:1902042                                         | regulation of extrinsic apoptotic signaling pathway via DDR                      |
|            | GO:1902045                                         | regulation of Fas signaling pathway                                              |
|            | GO:0033209                                         | tumor necrosis factor-mediated signaling pathway                                 |
|            | GO:0034599                                         | cellular response to oxidative stress                                            |
|            | GO:0030330                                         | DNA damage response, signal transduction by p53 class mediator                   |
|            | GO:0006355                                         | regulation of transcription, DNA-templated                                       |
|            | GO:0006357                                         | regulation of transcription from RNA polymerase II promoter                      |
|            | GO:0006366                                         | transcription from RNA polymerase II promoter                                    |
|            | GO:0090090                                         | negative regulation of canonical Wnt signaling pathway                           |
|            | GO:0006417                                         | regulation of translation                                                        |
| GO:0030154 | cell differentiation                               |                                                                                  |
| GO:0045648 | regulation of erythrocyte differentiation          |                                                                                  |
| GO:0007173 | epidermal growth factor receptor signaling pathway |                                                                                  |

Table S1. Cont.

| Human Gene | GO ID s                                                                                             | Qualified GO Term                                                                          |
|------------|-----------------------------------------------------------------------------------------------------|--------------------------------------------------------------------------------------------|
| ATM        | GO:0006915                                                                                          | apoptotic process                                                                          |
|            | GO:0051402                                                                                          | neuron apoptotic process                                                                   |
|            | GO:0008630                                                                                          | intrinsic apoptotic signaling pathway in response to DNA damage                            |
|            | GO:0043525                                                                                          | positive regulation of neuron apoptotic process                                            |
|            | GO:1901216                                                                                          | positive regulation of neuron death                                                        |
|            | GO:0090399                                                                                          | replicative senescence                                                                     |
|            | GO:0001666                                                                                          | response to hypoxia                                                                        |
|            | GO:0010506                                                                                          | regulation of autophagy                                                                    |
|            | GO:0034605                                                                                          | cellular response to heat                                                                  |
|            | GO:0006974                                                                                          | cellular response to DNA damage stimulus                                                   |
|            | GO:0006281                                                                                          | DNA repair                                                                                 |
|            | GO:0006975                                                                                          | DNA damage induced protein phosphorylation                                                 |
|            | GO:0006977                                                                                          | DNA damage response, signal transduction by p53 resulting in cell cycle arrest             |
|            | GO:0006302                                                                                          | double-strand break repair                                                                 |
|            | GO:0045003                                                                                          | double-strand break repair via synthesis-dependent strand annealing                        |
|            | GO:0043517                                                                                          | positive regulation of DNA damage response, signal transduction by p53                     |
|            | GO:0051726                                                                                          | regulation of cell cycle                                                                   |
|            | GO:0007050                                                                                          | cell cycle arrest                                                                          |
|            | GO:0007165                                                                                          | signal transduction                                                                        |
|            | GO:1901796                                                                                          | regulation of signal transduction by p53 class mediator                                    |
| GO:0006468 | protein phosphorylation                                                                             |                                                                                            |
| GO:0046777 | protein autophosphorylation                                                                         |                                                                                            |
| GO:0010212 | response to ionizing radiation                                                                      |                                                                                            |
| GO:0071480 | cellular response to gamma radiation                                                                |                                                                                            |
| GO:0071500 | cellular response to nitrosative stress                                                             |                                                                                            |
| BID        | GO:0006915                                                                                          | apoptotic process                                                                          |
|            | GO:0006919                                                                                          | activation of cysteine-type endopeptidase activity involved in apoptotic process           |
|            | GO:0008625                                                                                          | extrinsic apoptotic signaling pathway via death domain receptors                           |
|            | GO:0097193                                                                                          | intrinsic apoptotic signaling pathway                                                      |
|            | GO:2001244                                                                                          | positive regulation of intrinsic apoptotic signaling pathway                               |
|            | GO:0097191                                                                                          | extrinsic apoptotic signaling pathway                                                      |
|            | GO:2001238                                                                                          | positive regulation of extrinsic apoptotic signaling pathway                               |
|            | GO:0042770                                                                                          | signal transduction in response to DNA damage                                              |
|            | GO:0042127                                                                                          | regulation of cell proliferation                                                           |
|            | GO:0051402                                                                                          | neuron apoptotic process                                                                   |
|            | GO:0034349                                                                                          | glial cell apoptotic process                                                               |
|            | GO:0008637                                                                                          | apoptotic mitochondrial changes                                                            |
|            | GO:0090200                                                                                          | positive regulation of release of cytochrome c from mitochondria                           |
| GO:0097345 | mitochondrial outer membrane permeabilization                                                       |                                                                                            |
| GO:1900740 | regulation of protein insertion into mitochondrial membrane involved in apoptotic signaling pathway |                                                                                            |
| GO:1901030 | regulation of mitochondrial outer membrane permeabilization involved in apoptotic signaling pathway |                                                                                            |
| DEDD2      | GO:0008625                                                                                          | extrinsic apoptotic signaling pathway via death domain receptors                           |
|            | GO:2001238                                                                                          | positive regulation of extrinsic apoptotic signaling pathway                               |
|            | GO:0030262                                                                                          | apoptotic nuclear changes                                                                  |
|            | GO:0035556                                                                                          | intracellular signal transduction                                                          |
| GO:0006351 | transcription, DNA-templated                                                                        |                                                                                            |
| TRADD      | GO:0006915                                                                                          | apoptotic process                                                                          |
|            | GO:0012501                                                                                          | programmed cell death                                                                      |
|            | GO:0097191                                                                                          | extrinsic apoptotic signaling pathway                                                      |
|            | GO:1902041                                                                                          | regulation of extrinsic apoptotic signaling pathway via DDR                                |
|            | GO:0097296                                                                                          | activation of cysteine-type endopeptidase activity involved in apoptotic signaling pathway |
|            | GO:0006919                                                                                          | activation of cysteine-type endopeptidase activity involved in apoptotic process           |
|            | GO:0043154                                                                                          | negative regulation of cysteine-type endopeptidase activity involved in apoptotic process  |
|            | GO:0010803                                                                                          | regulation of tumor necrosis factor-mediated signaling pathway                             |
| GO:0007165 | signal transduction                                                                                 |                                                                                            |
| GO:0007249 | I-kappaB kinase/NF-kappaB signaling                                                                 |                                                                                            |

Table S1. Cont.

| Human Gene | GO ID s                                                                            | Qualified GO Term                                                      |
|------------|------------------------------------------------------------------------------------|------------------------------------------------------------------------|
| MYD88      | GO:0043066                                                                         | regulation of apoptotic process                                        |
|            | GO:0007165                                                                         | signal transduction                                                    |
|            | GO:0007254                                                                         | JNK cascade                                                            |
|            | GO:0019221                                                                         | cytokine-mediated signaling pathway                                    |
|            | GO:0006954                                                                         | inflammatory response                                                  |
|            | GO:0050727                                                                         | regulation of inflammatory response                                    |
|            | GO:2000338                                                                         | regulation of chemokine (C-X-C motif) ligand 1 production              |
|            | GO:1902622                                                                         | regulation of neutrophil migration                                     |
|            | GO:0051092                                                                         | regulation of NF-kappaB transcription factor activity                  |
|            | GO:0032496                                                                         | response to lipopolysaccharide                                         |
|            | GO:0031663                                                                         | lipopolysaccharide-mediated signaling pathway                          |
|            | GO:0032680                                                                         | regulation of tumor necrosis factor production                         |
|            | GO:0032760                                                                         | positive regulation of tumor necrosis factor production                |
|            | GO:0032755                                                                         | positive regulation of interleukin-6 production                        |
|            | GO:0032747                                                                         | positive regulation of interleukin-23 production                       |
|            | GO:0070555                                                                         | response to interleukin-1                                              |
|            | GO:0042127                                                                         | regulation of cell proliferation                                       |
| GO:0050671 | regulation of lymphocyte proliferation                                             |                                                                        |
| GO:0048661 | regulation of smooth muscle cell proliferation                                     |                                                                        |
| GO:0071260 | cellular response to mechanical stimulus                                           |                                                                        |
| PYCARD     | GO:0042981                                                                         | regulation of apoptotic process                                        |
|            | GO:0043065                                                                         | positive regulation of apoptotic process                               |
|            | GO:0042771                                                                         | intrinsic apoptotic signaling pathway in response to DNA damage by p53 |
|            | GO:2001238                                                                         | positive regulation of extrinsic apoptotic signaling pathway           |
|            | GO:0072332                                                                         | intrinsic apoptotic signaling pathway by p53 class mediator            |
|            | GO:2001242                                                                         | regulation of intrinsic apoptotic signaling pathway                    |
|            | GO:0006954                                                                         | inflammatory response                                                  |
|            | GO:0071222                                                                         | cellular response to lipopolysaccharide                                |
|            | GO:0010803                                                                         | regulation of tumor necrosis factor-mediated signaling pathway         |
|            | GO:0032760                                                                         | positive regulation of tumor necrosis factor production                |
|            | GO:0033209                                                                         | tumor necrosis factor-mediated signaling pathway                       |
|            | GO:0071356                                                                         | cellular response to tumor necrosis factor                             |
|            | GO:0050718                                                                         | positive regulation of interleukin-1 beta secretion                    |
|            | GO:0032755                                                                         | positive regulation of interleukin-6 production                        |
|            | GO:2000778                                                                         | positive regulation of interleukin-6 secretion                         |
|            | GO:0032729                                                                         | positive regulation of interferon-gamma production                     |
|            | GO:0007165                                                                         | signal transduction                                                    |
| GO:0070374 | regulation of ERK1 and ERK2 cascade                                                |                                                                        |
| GO:0071901 | negative regulation of protein serine/threonine kinase activity                    |                                                                        |
| GO:0051091 | positive regulation of sequence-specific DNA binding transcription factor activity |                                                                        |
| GO:0051092 | positive regulation of NF-kappaB transcription factor activity                     |                                                                        |
| GO:0043124 | regulation of I-kappaB kinase/NF-kappaB signaling                                  |                                                                        |
| TNFRSF1A   | GO:0008625                                                                         | extrinsic apoptotic signaling pathway via death domain receptors       |
|            | GO:0008630                                                                         | intrinsic apoptotic signaling pathway in response to DNA damage        |
|            | GO:0071550                                                                         | death-inducing signaling complex assembly                              |
|            | GO:0006954                                                                         | inflammatory response                                                  |
|            | GO:0050728                                                                         | regulation of inflammatory response                                    |
|            | GO:0007165                                                                         | signal transduction                                                    |
|            | GO:0007249                                                                         | I-kappaB kinase/NF-kappaB signaling                                    |
|            | GO:0007166                                                                         | cell surface receptor signaling pathway                                |
|            | GO:0019221                                                                         | cytokine-mediated signaling pathway                                    |
| GO:0042127 | regulation of cell proliferation                                                   |                                                                        |
| GO:0007275 | multicellular organism development                                                 |                                                                        |
| TNFRSF14   | GO:0097190                                                                         | apoptotic signaling pathway                                            |
|            | GO:0007166                                                                         | cell surface receptor signaling pathway                                |
|            | GO:0042127                                                                         | regulation of cell proliferation                                       |
|            | GO:0043410                                                                         | regulation of MAPK cascade                                             |
|            | GO:0046642                                                                         | regulation of T cell proliferation                                     |
| GO:0007275 | multicellular organism development                                                 |                                                                        |

Table S1. Cont.

| Human Gene | GO ID <sup>§</sup>                | Qualified GO Term                                                                          |                                                                                  |
|------------|-----------------------------------|--------------------------------------------------------------------------------------------|----------------------------------------------------------------------------------|
| TNFSF10    | GO:0012501                        | programmed cell death                                                                      |                                                                                  |
|            | GO:2001238                        | regulation of extrinsic apoptotic signaling pathway                                        |                                                                                  |
|            | GO:1902041                        | regulation of extrinsic apoptotic signaling pathway via death domain receptors             |                                                                                  |
|            | GO:1902042                        | negative regulation of extrinsic apoptotic signaling pathway via DDR                       |                                                                                  |
|            | GO:0006919                        | activation of cysteine-type endopeptidase activity involved in apoptotic process           |                                                                                  |
|            | GO:0097296                        | activation of cysteine-type endopeptidase activity involved in apoptotic signaling pathway |                                                                                  |
|            | GO:0043154                        | negative regulation of cysteine-type endopeptidase activity involved in apoptotic process  |                                                                                  |
|            | GO:0070266                        | necroptotic process                                                                        |                                                                                  |
|            | GO:0010939                        | regulation of necrotic cell death                                                          |                                                                                  |
|            | GO:0097300                        | programmed necrotic cell death                                                             |                                                                                  |
| TNFSF13B   | GO:0007165                        | signal transduction                                                                        |                                                                                  |
|            | GO:0007267                        | cell-cell signaling                                                                        |                                                                                  |
|            | GO:0006955                        | immune response                                                                            |                                                                                  |
|            | CASP1                             | GO:0006919                                                                                 | activation of cysteine-type endopeptidase activity involved in apoptotic process |
|            |                                   | GO:0007165                                                                                 | signal transduction                                                              |
|            |                                   | GO:0043123                                                                                 | positive regulation of I-kappaB kinase/NF-kappaB signaling                       |
|            |                                   | GO:0050715                                                                                 | positive regulation of cytokine secretion                                        |
|            |                                   | GO:0032611                                                                                 | interleukin-1 beta production                                                    |
|            |                                   | GO:0050717                                                                                 | positive regulation of interleukin-1 alpha secretion                             |
|            |                                   | GO:0050718                                                                                 | positive regulation of interleukin-1 beta secretion                              |
| GO:0032496 |                                   | response to lipopolysaccharide                                                             |                                                                                  |
| GO:0001666 |                                   | response to hypoxia                                                                        |                                                                                  |
| GO:0016485 |                                   | protein processing                                                                         |                                                                                  |
| CASP2      | GO:0006915                        | apoptotic process                                                                          |                                                                                  |
|            | GO:0097194                        | execution phase of apoptosis                                                               |                                                                                  |
|            | GO:2001235                        | regulation of apoptotic signaling pathway                                                  |                                                                                  |
|            | GO:0006919                        | activation of cysteine-type endopeptidase activity involved in apoptotic process           |                                                                                  |
|            | GO:0043281                        | regulation of cysteine-type endopeptidase activity involved in apoptotic process           |                                                                                  |
|            | GO:0035234                        | ectopic germ cell programmed cell death                                                    |                                                                                  |
|            | GO:0006977                        | DNA damage response, signal transduction by p53 resulting in cell cycle arrest             |                                                                                  |
|            | GO:0016485                        | protein processing                                                                         |                                                                                  |
|            | GO:0006508                        | proteolysis                                                                                |                                                                                  |
| CASP4      | GO:0007568                        | cell aging                                                                                 |                                                                                  |
|            | GO:0097193                        | intrinsic apoptotic signaling pathway                                                      |                                                                                  |
|            | GO:0070059                        | intrinsic apoptotic signaling pathway in response to RE stress                             |                                                                                  |
|            | GO:0050727                        | regulation of inflammatory response                                                        |                                                                                  |
|            | GO:1904646                        | cellular response to beta-amyloid                                                          |                                                                                  |
| DAPK1      | GO:0006508                        | proteolysis                                                                                |                                                                                  |
|            | GO:0006915                        | apoptotic process                                                                          |                                                                                  |
|            | GO:004306                         | negative regulation of apoptotic process                                                   |                                                                                  |
|            | GO:009710                         | apoptotic signaling pathway                                                                |                                                                                  |
|            | GO:009791                         | extrinsic apoptotic signaling pathway                                                      |                                                                                  |
|            | GO:0008625                        | extrinsic apoptotic signaling pathway via death domain receptors                           |                                                                                  |
|            | GO:1902042                        | negative regulation of extrinsic apoptotic signaling pathway via DDR                       |                                                                                  |
|            | GO:0097192                        | extrinsic apoptotic signaling pathway in absence of ligand                                 |                                                                                  |
|            | GO:0071346                        | cellular response to interferon-gamma                                                      |                                                                                  |
|            | GO:0007165                        | signal transduction                                                                        |                                                                                  |
| GO:0035556 | intracellular signal transduction |                                                                                            |                                                                                  |
| XAF1       | GO:0006468                        | protein phosphorylation                                                                    |                                                                                  |
|            | GO:0046777                        | protein autophosphorylation                                                                |                                                                                  |
| TNFAIP6    | GO:0006915                        | apoptotic process                                                                          |                                                                                  |
|            | GO:0007165                        | signal transduction                                                                        |                                                                                  |
|            | GO:0007267                        | cell-cell signaling                                                                        |                                                                                  |

<sup>§</sup> Data from the Gene Ontology (2009).

**Table S2.** Gene Ontology (GO) terms for cell survival-related biological processes that are over-represented in the list of significantly changed anti-apoptotic/pro-survival genes in the Table 3 in CD34<sup>+</sup> cells from GHD patients treated for 6 months with GH-TS compared to GHD subjects before GH therapy.

| Human Gene | GO ID <sup>s</sup>                                         | Qualified GO Term                                                               |
|------------|------------------------------------------------------------|---------------------------------------------------------------------------------|
| CDK6       | GO:0060218                                                 | hematopoietic stem cell differentiation                                         |
|            | GO:0002244                                                 | hematopoietic progenitor cell differentiation                                   |
|            | GO:0045596                                                 | regulation of cell differentiation                                              |
|            | GO:0045646                                                 | regulation of erythrocyte differentiation                                       |
|            | GO:0033077                                                 | T cell differentiation in thymus                                                |
|            | GO:0045638                                                 | regulation of myeloid cell differentiation                                      |
|            | GO:0000082                                                 | G1/S transition of mitotic cell cycle                                           |
|            | GO:0051301                                                 | cell division                                                                   |
|            | GO:0007050                                                 | control of cell cycle arrest                                                    |
|            | GO:0010468                                                 | regulation of gene expression                                                   |
|            | GO:0010628                                                 | positive regulation of gene expression                                          |
|            | GO:0006468                                                 | protein phosphorylation                                                         |
|            | GO:0007219                                                 | Notch signaling pathway                                                         |
|            | GO:0048699                                                 | generation of neurons                                                           |
|            | GO:0042063                                                 | gliogenesis                                                                     |
|            | GO:0050680                                                 | negative regulation of epithelial cell proliferation                            |
| GO:2000773 | negative regulation of cellular senescence                 |                                                                                 |
| GO:0001954 | positive regulation of cell-matrix adhesion                |                                                                                 |
| NPM1       | GO:0043066                                                 | negative regulation of apoptotic process                                        |
|            | GO:0044387                                                 | negative regulation of kinase activity by regulation of protein phosphorylation |
|            | GO:1902751                                                 | regulation of cell cycle G2/M phase transition                                  |
|            | GO:0008104                                                 | protein localization                                                            |
|            | GO:0051092                                                 | positive regulation of NF-kappaB transcription factor activity                  |
|            | GO:0045727                                                 | positive regulation of translation                                              |
|            | GO:0060735                                                 | regulation of eIF2 alpha phosphorylation by dsRNA                               |
|            | GO:0060699                                                 | regulation of endoribonuclease activity                                         |
| GO:0007569 | cell aging                                                 |                                                                                 |
| TNFAIP3    | GO:0006915                                                 | apoptotic process                                                               |
|            | GO:0060548                                                 | negative regulation of cell death                                               |
|            | GO:1902042                                                 | negative regulation of extrinsic apoptotic signaling pathway via DDR            |
|            | GO:2000352                                                 | negative regulation of endothelial cell apoptotic process                       |
|            | GO:0033209                                                 | tumor necrosis factor-mediated signaling pathway                                |
|            | GO:0010803                                                 | regulation of tumor necrosis factor-mediated signaling pathway                  |
|            | GO:2000349                                                 | negative regulation of CD40 signaling pathway                                   |
|            | GO:0050727                                                 | regulation of inflammatory response                                             |
|            | GO:0050728                                                 | negative regulation of inflammatory response                                    |
|            | GO:0002677                                                 | negative regulation of chronic inflammatory response                            |
|            | GO:0032691                                                 | negative regulation of interleukin-1 beta production                            |
|            | GO:0032703                                                 | negative regulation of interleukin-2 production                                 |
|            | GO:0032715                                                 | negative regulation of interleukin-6 production                                 |
|            | GO:0045736                                                 | regulation of cyclin-dependent protein serine/threonine kinase activity         |
|            | GO:0032088                                                 | negative regulation of NF-kappaB transcription factor activity                  |
| GO:0043124 | negative regulation of I-kappaB kinase/NF-kappaB signaling |                                                                                 |
| GO:0006955 | immune response                                            |                                                                                 |
| GO:2000347 | positive regulation of hepatocyte proliferation            |                                                                                 |
| GO:0090291 | regulation of osteoclast proliferation                     |                                                                                 |
| GO:0070301 | cellular response to hydrogen peroxide                     |                                                                                 |
| GO:0051259 | protein oligomerization                                    |                                                                                 |
| BCL2A1     | GO:0043066                                                 | negative regulation of apoptotic process                                        |
|            | GO:0008630                                                 | intrinsic apoptotic signaling pathway in response to DNA damage                 |
|            | GO:0001836                                                 | release of cytochrome c from mitochondria                                       |
| CCND2      | GO:0000079                                                 | regulation of cyclin-dependent protein serine/threonine kinase activity         |
|            | GO:0050679                                                 | positive regulation of epithelial cell proliferation                            |
|            | GO:0045737                                                 | positive regulation of cyclin-dependent protein kinase activity                 |
|            | GO:0008284                                                 | positive regulation of cell proliferation                                       |
|            | GO:0051726                                                 | regulation of cell cycle                                                        |
|            | GO:0001934                                                 | positive regulation of protein phosphorylation                                  |
|            | GO:0000082                                                 | G1/S transition of mitotic cell cycle                                           |
| GO:0051301 | regulation of cell division                                |                                                                                 |

Table S2. Cont.

| Human Gene | GO ID <sup>s</sup> | Qualified GO Term                                                                 |
|------------|--------------------|-----------------------------------------------------------------------------------|
| BCL3       | GO:0006351         | transcription, DNA-templated                                                      |
|            | GO:0045893         | positive regulation of transcription, DNA-templated                               |
|            | GO:0045944         | positive regulation of transcription from RNA polymerase II promoter              |
|            | GO:0045727         | positive regulation of translation                                                |
|            | GO:0007249         | I-kappaB kinase/NF-kappaB signaling                                               |
|            | GO:0006974         | cellular response to DNA damage stimulus                                          |
|            | GO:0030330         | DNA damage response, signal transduction by p53 class mediator                    |
|            | GO:0045064         | T-helper cell differentiation                                                     |
|            | GO:0002315         | marginal zone B cell differentiation                                              |
|            | GO:0045415         | negative regulation of interleukin-8 biosynthetic process                         |
|            | GO:0042536         | negative regulation of tumor necrosis factor biosynthetic process                 |
| JTB        | GO:0032729         | positive regulation of interferon-gamma production                                |
|            | GO:0045082         | positive regulation of interleukin-10 biosynthetic process                        |
| MCL1       | GO:0051457         | maintenance of protein location in nucleus                                        |
|            | GO:0008637         | apoptotic mitochondrial changes                                                   |
|            | GO:1903378         | positive regulation of oxidative stress-induced neuron intrinsic apoptosis        |
|            | GO:0097192         | extrinsic apoptotic signaling pathway in absence of ligand                        |
|            | GO:0034097         | response to cytokine                                                              |
| PROK2      | GO:0007275         | multicellular organism development                                                |
|            | GO:0019725         | cellular homeostasis                                                              |
|            | GO:0043066         | negative regulation of apoptotic process                                          |
|            | GO:0001525         | angiogenesis                                                                      |
|            | GO:0045765         | regulation of angiogenesis                                                        |
|            | GO:0007186         | G-protein coupled receptor signaling pathway                                      |
| PRDX5      | GO:0007218         | neuropeptide signaling pathway                                                    |
|            | GO:0006954         | inflammatory response                                                             |
|            | GO:0006935         | chemotaxis                                                                        |
|            | GO:0006915         | apoptotic process                                                                 |
|            | GO:0043066         | negative regulation of apoptotic process                                          |
| DAD1       | GO:0034614         | cellular response to reactive oxygen species                                      |
|            | GO:0051354         | negative regulation of oxidoreductase activity                                    |
|            | GO:0070995         | NADPH oxidation                                                                   |
|            | GO:0044267         | cellular protein metabolic process                                                |
| CFLAR      | GO:0043687         | post-translational protein modification                                           |
|            | GO:0006486         | protein glycosylation                                                             |
|            | GO:0006915         | apoptotic process                                                                 |
|            | GO:0012501         | programmed cell death                                                             |
|            | GO:0043066         | negative regulation of apoptotic process                                          |
|            | GO:0043154         | negative regulation of cysteine-type endopeptidase activity involved in apoptosis |
|            | GO:2001237         | negative regulation of extrinsic apoptotic signaling pathway                      |
|            | GO:1902041         | regulation of extrinsic apoptotic signaling pathway via DDR                       |
|            | GO:0097296         | activation of cysteine-type endopeptidase activity involved in apoptosis          |
|            | GO:0097194         | execution phase of apoptosis                                                      |
|            | GO:0010939         | regulation of necrotic cell death                                                 |
|            | GO:0051092         | positive regulation of NF-kappaB transcription factor activity                    |
|            | GO:0007519         | skeletal muscle tissue development                                                |
| ATF6       | GO:0014842         | regulation of skeletal muscle satellite cell proliferation                        |
|            | GO:0043403         | skeletal muscle tissue regeneration                                               |
|            | GO:0007165         | signal transduction                                                               |
| ATF6       | GO:0006990         | positive regulation of transcription from RNA polymerase II promoter              |
|            | GO:0044267         | cellular protein metabolic process                                                |

**Table S2.** *Cont.*

| Human Gene | GO ID <sup>§</sup> | Qualified GO Term                                                                |
|------------|--------------------|----------------------------------------------------------------------------------|
| CASP2      | GO:0006915         | apoptotic process                                                                |
|            | GO:0097194         | execution phase of apoptosis                                                     |
|            | GO:2001235         | regulation of apoptotic signaling pathway                                        |
|            | GO:0006919         | activation of cysteine-type endopeptidase activity involved in apoptotic process |
|            | GO:0043281         | regulation of cysteine-type endopeptidase activity involved in apoptotic process |
|            | GO:0035234         | ectopic germ cell programmed cell death                                          |
|            | GO:0006977         | DNA damage response, signal transduction by p53 resulting in cell cycle arrest   |
|            | GO:0016485         | protein processing                                                               |
|            | GO:0006508         | proteolysis                                                                      |
|            | GO:0007568         | aging                                                                            |

<sup>§</sup> Data from the Gene Ontology (2009).

**Table S3.** Gene Ontology (GO) terms for cell survival-related biological processes that are over-represented in the list of significantly changed anti-apoptotic/pro-survival genes in the Table 4 in CD34<sup>+</sup> cells from untreated GHD patients prior to GH-TS compared to their controls

| Human Gene | GO ID <sup>§</sup>                                         | Qualified GO Term                                                       |
|------------|------------------------------------------------------------|-------------------------------------------------------------------------|
| BCL2A1     | GO:0043066                                                 | negative regulation of apoptotic process                                |
|            | GO:0008630                                                 | intrinsic apoptotic signaling pathway in response to DNA damage         |
|            | GO:0001836                                                 | release of cytochrome c from mitochondria                               |
| TNFAIP3    | GO:0006915                                                 | apoptotic process                                                       |
|            | GO:0060548                                                 | negative regulation of cell death                                       |
|            | GO:1902042                                                 | negative regulation of extrinsic apoptotic pathway via DDR              |
|            | GO:2000352                                                 | negative regulation of endothelial cell apoptotic process               |
|            | GO:0033209                                                 | tumor necrosis factor-mediated signaling pathway                        |
|            | GO:0010803                                                 | regulation of tumor necrosis factor-mediated signaling pathway          |
|            | GO:2000349                                                 | negative regulation of CD40 signaling pathway                           |
|            | GO:0050727                                                 | regulation of inflammatory response                                     |
|            | GO:0050728                                                 | negative regulation of inflammatory response                            |
|            | GO:0002677                                                 | negative regulation of chronic inflammatory response                    |
|            | GO:0032691                                                 | negative regulation of interleukin-1 beta production                    |
|            | GO:0032703                                                 | negative regulation of interleukin-2 production                         |
|            | GO:0032715                                                 | negative regulation of interleukin-6 production                         |
|            | GO:0045736                                                 | regulation of cyclin-dependent protein serine/threonine kinase activity |
|            | GO:0032088                                                 | negative regulation of NF-kappaB transcription factor activity          |
|            | GO:0043124                                                 | negative regulation of I-kappaB kinase/NF-kappaB signaling              |
| GO:0006955 | immune response                                            |                                                                         |
| GO:2000347 | positive regulation of hepatocyte proliferation            |                                                                         |
| GO:0090291 | regulation of osteoclast proliferation                     |                                                                         |
| GO:0070301 | cellular response to hydrogen peroxide                     |                                                                         |
| GO:0051259 | protein oligomerization                                    |                                                                         |
| BCL3       | GO:0006351                                                 | transcription, DNA-templated                                            |
|            | GO:0045893                                                 | positive regulation of transcription, DNA-templated                     |
|            | GO:0045944                                                 | positive regulation of transcription from RNA polymerase II promoter    |
|            | GO:0045727                                                 | positive regulation of translation                                      |
|            | GO:0007249                                                 | I-kappaB kinase/NF-kappaB signaling                                     |
|            | GO:0006974                                                 | cellular response to DNA damage stimulus                                |
|            | GO:0030330                                                 | DNA damage response, signal transduction by p53 class mediator          |
|            | GO:0045064                                                 | T-helper cell differentiation                                           |
|            | GO:0002315                                                 | marginal zone B cell differentiation                                    |
|            | GO:0045415                                                 | negative regulation of interleukin-8 biosynthetic process               |
|            | GO:0042536                                                 | negative regulation of tumor necrosis factor biosynthetic process       |
|            | GO:0032729                                                 | positive regulation of interferon-gamma production                      |
| GO:0045082 | positive regulation of interleukin-10 biosynthetic process |                                                                         |
| GO:0051457 | maintenance of protein location in nucleus                 |                                                                         |
| ATF6       | GO:0007165                                                 | signal transduction                                                     |
|            | GO:0006990                                                 | positive regulation of transcription from RNA polymerase II promoter    |
|            | GO:0044267                                                 | cellular protein metabolic process                                      |



Table S3. Cont.

| Human Gene | GO ID <sup>§</sup> | Qualified GO Term                                                                 |
|------------|--------------------|-----------------------------------------------------------------------------------|
| CFLAR      | GO:0006915         | apoptotic process                                                                 |
|            | GO:0012501         | programmed cell death                                                             |
|            | GO:0043066         | negative regulation of apoptotic process                                          |
|            | GO:0043154         | negative regulation of cysteine-type endopeptidase activity involved in apoptosis |
|            | GO:2001237         | negative regulation of extrinsic apoptotic signaling pathway                      |
|            | GO:1902041         | regulation of extrinsic apoptotic signaling pathway via DDR                       |
|            | GO:0097296         | activation of cysteine-type endopeptidase activity involved in apoptosis          |
|            | GO:0097194         | execution phase of apoptosis                                                      |
|            | GO:0010939         | regulation of necrotic cell death                                                 |
|            | GO:0051092         | positive regulation of NF-kappaB transcription factor activity                    |
| MCL1       | GO:0007519         | skeletal muscle tissue development                                                |
|            | GO:0014842         | regulation of skeletal muscle satellite cell proliferation                        |
|            | GO:0043403         | skeletal muscle tissue regeneration                                               |
|            | GO:1903378         | positive regulation of oxidative stress-induced neuron apoptosis                  |
|            | GO:0097192         | extrinsic apoptotic signaling pathway in absence of ligand                        |
| PROK2      | GO:0034097         | response to cytokine                                                              |
|            | GO:0007275         | multicellular organism development                                                |
|            | GO:0019725         | cellular homeostasis                                                              |
|            | GO:0043066         | negative regulation of apoptotic process                                          |
|            | GO:0001525         | angiogenesis                                                                      |
|            | GO:0045765         | regulation of angiogenesis                                                        |
| PRDX5      | GO:0007186         | G-protein coupled receptor signaling pathway                                      |
|            | GO:0007218         | neuropeptide signaling pathway                                                    |
|            | GO:0006954         | inflammatory response                                                             |
|            | GO:0006935         | chemotaxis                                                                        |
|            | GO:0006915         | apoptotic process                                                                 |
| JTB        | GO:0043066         | negative regulation of apoptotic process                                          |
|            | GO:0034614         | cellular response to reactive oxygen species                                      |
|            | GO:0051354         | negative regulation of oxidoreductase activity                                    |
|            | GO:0070995         | NADPH oxidation                                                                   |

<sup>§</sup> Data from the Gene Ontology (2009).

**Table S4.** Gene Ontology (GO) terms for apoptosis-related biological processes that are over-represented in the list of significantly changed pro-apoptotic genes in the Table 5 in CD34<sup>+</sup> cells from untreated GHD patients prior to GH-TS compared to their controls.

| Human Gene | GO ID <sup>§</sup>                 | Qualified GO Term                                                                |
|------------|------------------------------------|----------------------------------------------------------------------------------|
| FN1A       | GO:0012501                         | programmed cell death                                                            |
|            | GO:0006921                         | cellular component disassembly involved in execution phase of apoptosis          |
|            | GO:0007528                         | neuromuscular junction development                                               |
| NFKB1      | GO:0006351                         | transcription, DNA-templated                                                     |
| GADD45B    | GO:0006915                         | apoptotic process                                                                |
|            | GO:0006950                         | response to stress                                                               |
|            | GO:0006469                         | negative regulation of protein kinase activity                                   |
|            | GO:0000186                         | activation of MAPKK activity                                                     |
|            | GO:0000185                         | activation of MAPKKK activity                                                    |
|            | GO:1900745                         | positive regulation of p38MAPK cascade                                           |
|            | GO:0046330                         | positive regulation of JNK cascade                                               |
|            | GO:0051726                         | regulation of cell cycle                                                         |
| GO:0007275 | multicellular organism development |                                                                                  |
| TNF        | GO:0043068                         | positive regulation of programmed cell death                                     |
|            | GO:0071550                         | death-inducing signaling complex assembly                                        |
|            | GO:0008625                         | extrinsic apoptotic signaling pathway via death domain receptors                 |
|            | GO:0008630                         | intrinsic apoptotic signaling pathway in response to DNA damage                  |
|            | GO:0006919                         | activation of cysteine-type endopeptidase activity involved in apoptotic process |
| GO:0006927 | transformed cell apoptotic process |                                                                                  |

Table S4. Cont.

| Human Gene | GO ID <sup>§</sup>                           | Qualified GO Term                                                                               |
|------------|----------------------------------------------|-------------------------------------------------------------------------------------------------|
| TNFRSF10C  | GO:0008625                                   | extrinsic apoptotic signaling pathway via death domain receptors                                |
|            | GO:0033209                                   | tumor necrosis factor-mediated signaling pathway                                                |
|            | GO:0007275                                   | multicellular organism development                                                              |
|            | GO:0032496                                   | response to lipopolysaccharide                                                                  |
|            | GO:0007165                                   | signal transduction                                                                             |
| TNFRSF1A   | GO:0008625                                   | extrinsic apoptotic signaling pathway via death domain receptors                                |
|            | GO:0008630                                   | intrinsic apoptotic signaling pathway in response to DNA damage                                 |
|            | GO:0071550                                   | death-inducing signaling complex assembly                                                       |
|            | GO:0006954                                   | inflammatory response                                                                           |
|            | GO:0050728                                   | regulation of inflammatory response                                                             |
|            | GO:0007165                                   | signal transduction                                                                             |
|            | GO:0007249                                   | I-kappaB kinase/NF-kappaB signaling                                                             |
|            | GO:0007166                                   | cell surface receptor signaling pathway                                                         |
|            | GO:0019221                                   | cytokine-mediated signaling pathway                                                             |
|            | GO:0042127                                   | regulation of cell proliferation                                                                |
| GO:0007275 | multicellular organism development           |                                                                                                 |
| LITAF      | GO:0006351                                   | transcription, DNA-templated                                                                    |
|            | GO:0007165                                   | signal transduction                                                                             |
|            | GO:0007568                                   | aging                                                                                           |
|            | GO:0042347                                   | negative regulation of NF-kappaB import into nucleus                                            |
|            | GO:0043123                                   | positive regulation of I-kappaB kinase/NF-kappaB signaling                                      |
| CASP4      | GO:0097193                                   | intrinsic apoptotic signaling pathway                                                           |
|            | GO:0070059                                   | intrinsic apoptotic signaling pathway in response to RE stress                                  |
|            | GO:0050727                                   | regulation of inflammatory response                                                             |
|            | GO:1904646                                   | cellular response to beta-amyloid                                                               |
|            | GO:0006508                                   | proteolysis                                                                                     |
| CASP8      | GO:0006915                                   | apoptotic process                                                                               |
|            | GO:0006919                                   | activation of cysteine-type endopeptidase activity involved in apoptotic process                |
|            | GO:0012501                                   | programmed cell death                                                                           |
|            | GO:0006921                                   | cellular component disassembly involved in execution phase of apoptosis                         |
|            | GO:0097191                                   | extrinsic apoptotic signaling pathway                                                           |
|            | GO:0097193                                   | intrinsic apoptotic signaling pathway                                                           |
|            | GO:0043154                                   | negative regulation of cysteine-type endopeptidase activity involved in apoptotic process       |
|            | GO:0097296                                   | activation of cysteine-type endopeptidase activity involved in apoptotic signaling pathway      |
|            | GO:1902041                                   | regulation of extrinsic apoptotic signaling pathway via death domain receptors                  |
|            | GO:1902042                                   | negative regulation of extrinsic apoptotic pathway via DDR                                      |
|            | GO:0036462                                   | TRAIL-activated apoptotic signaling pathway                                                     |
|            | GO:0039650                                   | suppression by virus of host cysteine-type endopeptidase activity involved in apoptotic process |
|            | GO:0033209                                   | tumor necrosis factor-mediated signaling pathway                                                |
|            | GO:0010803                                   | regulation of tumor necrosis factor-mediated signaling pathway                                  |
|            | GO:0010939                                   | regulation of necrotic cell death                                                               |
|            | GO:0071550                                   | death-inducing signaling complex assembly                                                       |
|            | GO:0006508                                   | proteolysis                                                                                     |
|            | GO:0045862                                   | positive regulation of proteolysis                                                              |
|            | GO:0051603                                   | proteolysis involved in cellular protein catabolic process                                      |
|            | GO:0043124                                   | negative regulation of I-kappaB kinase/NF-kappaB signaling                                      |
|            | GO:0045651                                   | positive regulation of macrophage differentiation                                               |
|            | GO:0030225                                   | macrophage differentiation                                                                      |
| GO:0042113 | B cell activation                            |                                                                                                 |
| GO:0009409 | response to cold                             |                                                                                                 |
| GO:0071260 | cellular response to mechanical stimulus     |                                                                                                 |
| GO:0071407 | cellular response to organic cyclic compound |                                                                                                 |
| TNFAIP6    | GO:0007165                                   | signal transduction                                                                             |
|            | GO:0007267                                   | cell-cell signaling                                                                             |
| SMNDC1     | GO:0006915                                   | induction of programmed cell death by apoptosis                                                 |

<sup>§</sup> Data from the Gene Ontology (2009).
